# Supplementary material for: Real-World Effectiveness of Inhalation Therapy Among Patients With Symptomatic COPD in China: A Multicenter Prospective Study
Source: Frontiers journal article supplement (doi:10.3389/fphar.2021.753653), 2021-09-21
Supplement: Table_3.docx [file Table_3.docx]

**Table 3** Response rate of MCID between different clinical features for symptomatic COPD patients

| Clinical feature | Total, N | Patients with MCID,  n(%) | Patients without MCID, n(%) | *P*-value |
| --- | --- | --- | --- | --- |
| Age (year) |  |  |  | 0.131 |
| ＜65 | 387 | 180(46.5) | 207(53.5) |  |
| ≥65 | 308 | 161(52.3) | 147(47.7) |  |
| Sex |  |  |  | **0.004** |
| Male | 630 | 298(47.3) | 332(52.7) |  |
| Female | 65 | 43(66.2) | 22(33.8) |  |
| BMI (kg/m2) |  |  |  | 0.575 |
| ＜24 | 500 | 242(48.4) | 258(51.6) |  |
| ≥24 | 195 | 99(50.8) | 96(49.2) |  |
| Smoking history |  |  |  | 0.290 |
| Never smoker | 134 | 66(49.3) | 68(50.7) |  |
| Former smoker | 274 | 125(45.6) | 149(54.4) |  |
| Current smoker | 287 | 150(52.3) | 137(47.7) |  |
| Occupational exposure |  |  |  | 0.218 |
| Yes | 242 | 111(45.9) | 131(54.1) |  |
| No | 453 | 230(50.8) | 223(49.2) |  |
| Biofuel exposure |  |  |  | 0.813 |
| Yes | 219 | 106(48.4) | 113(51.6) |  |
| No | 476 | 235(49.4) | 241(50.6) |  |
| AE in the past 1 year |  |  |  | 0.738 |
| 0 | 285 | 142(49.8) | 143(50.2) |  |
| ≥1 | 410 | 199(48.5) | 211(51.5) |  |
| COPD severity |  |  |  | 0.212 |
| Mild | 40 | 20(50.0) | 20(50.0) |  |
| Moderate | 282 | 126(44.7) | 156(55.3) |  |
| Severe | 288 | 147(51.0) | 141(49.0) |  |
| Very severe | 85 | 48(56.5) | 37(43.5) |  |
| Group B/D |  |  |  | 0.673 |
| Group B | 344 | 166(48.3) | 178(51.7) |  |
| Group D | 351 | 175(49.1) | 176(50.9) |  |
| Treatment status at baseline |  |  |  | 0.073 |
| Initial treatment | 624 | 299(47.9) | 325(52.1) |  |
| Adjust treatment | 71 | 42(59.2) | 29(40.8) |  |

**Note:** For comparison, Chi-square was used for categorical variables; the bold *P*-values indicate statistical significance.

**Abbreviations**: MCID, minimum clinically important difference; BMI, body mass index; AE, acute exacerbation; COPD severity was classified using Global Initiative for Chronic Obstructive Lung Disease (GOLD) criteria.
